# Supplementary material
Source: bioRxiv or medRxiv preprint supplement (https://www.medrxiv.org/highwire/filestream/86153/field_highwire_adjunct_files/1/2020.06.15.20131672-2.pdf)
Supplement: Supplementary file [file 2020.06.15.20131672-2.pdf]

# COVID-19 sera #18, #21

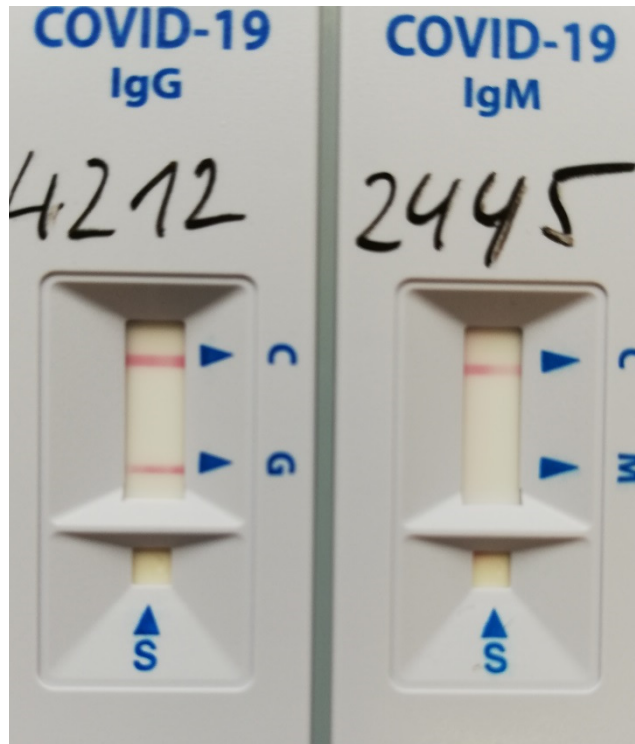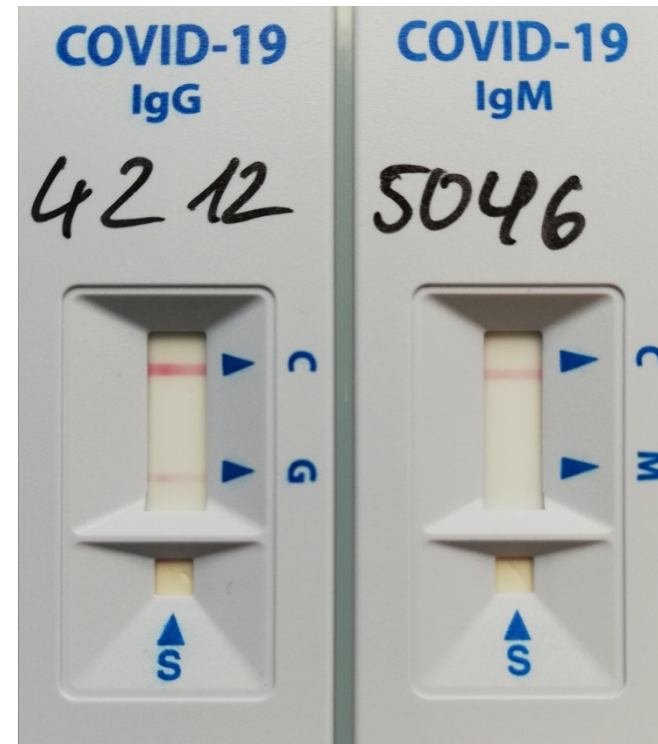

→ IgG positive

# COVID-19 serum #2

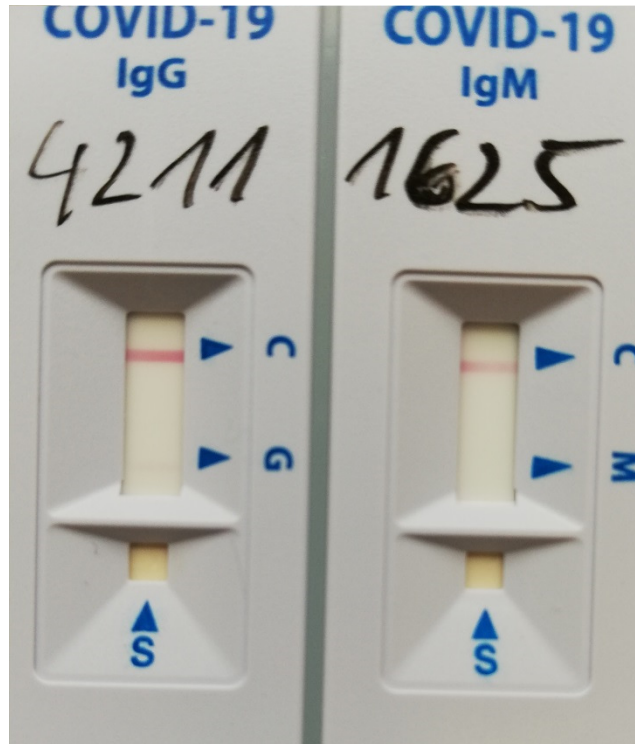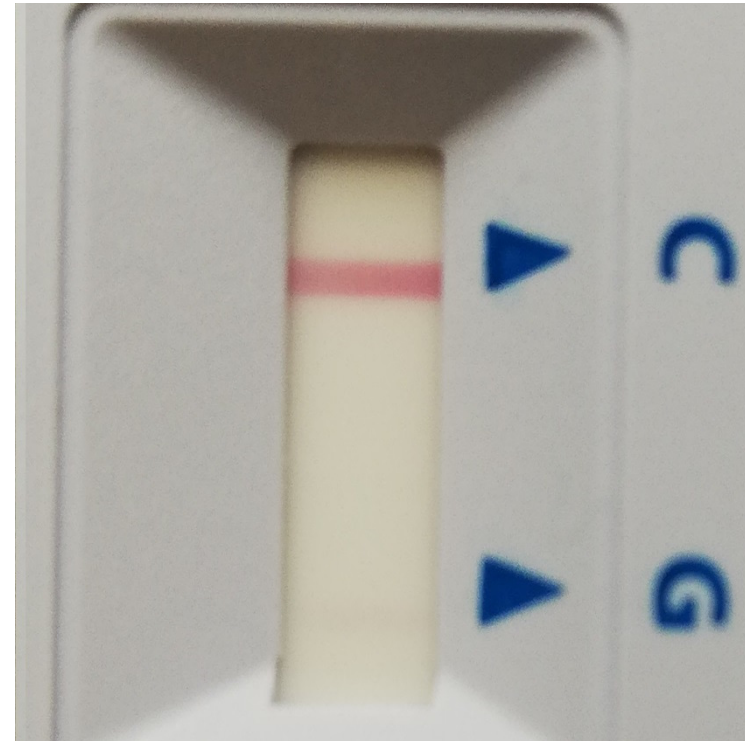

→ IgG weakly positive

# COVID-19 serum #12

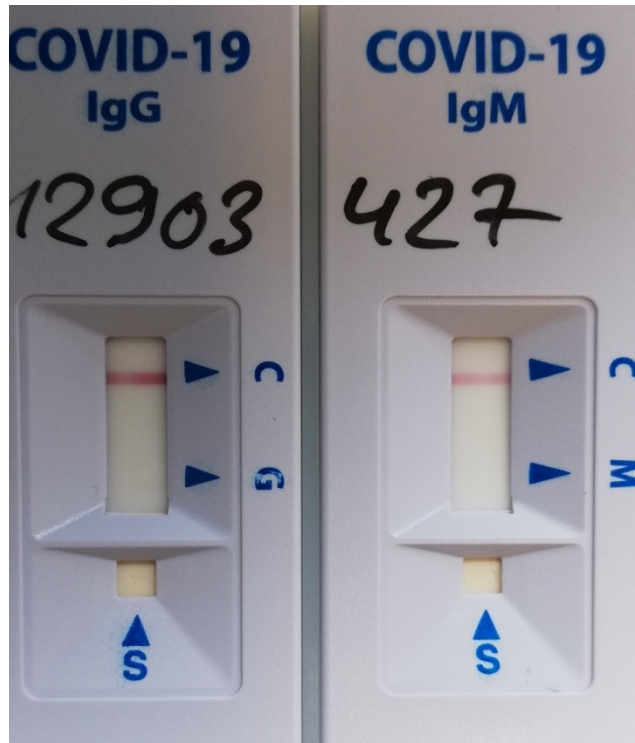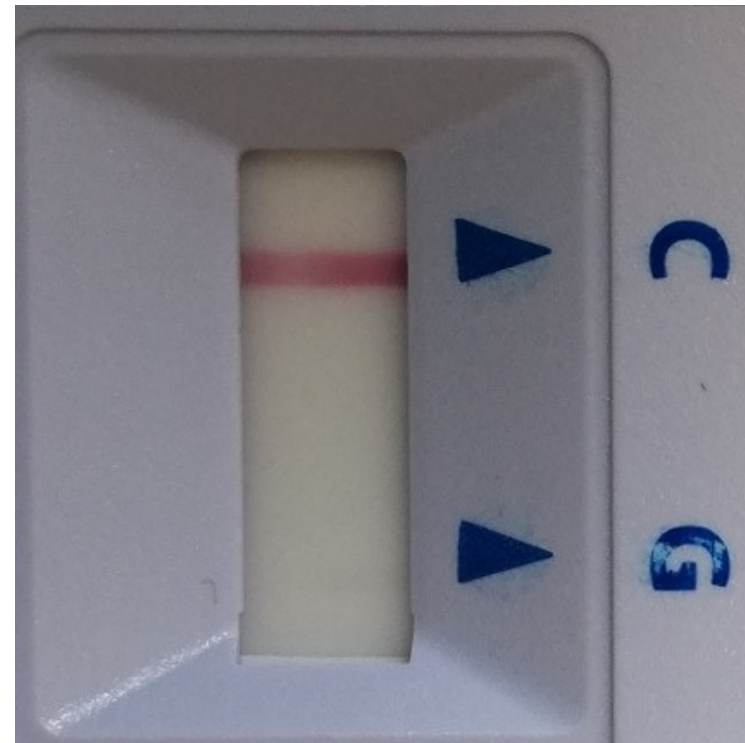

→ IgG weakly positive

# COVID-19 serum #16

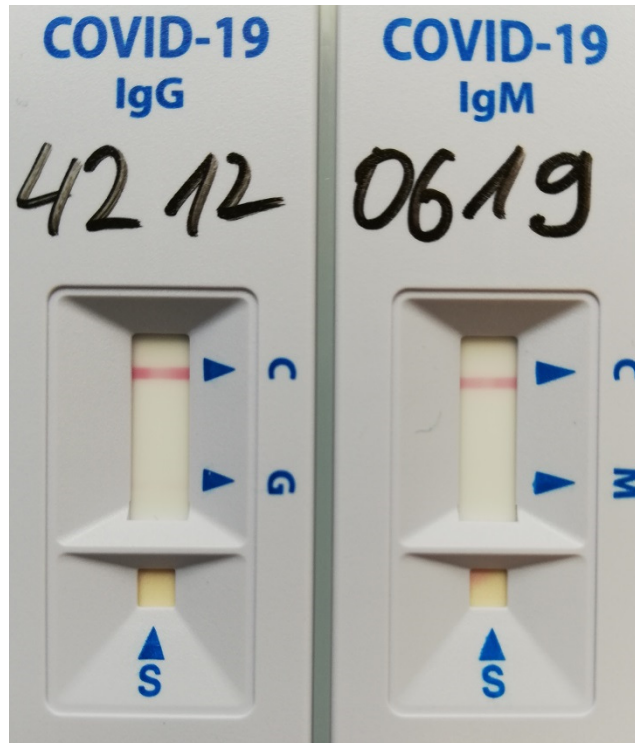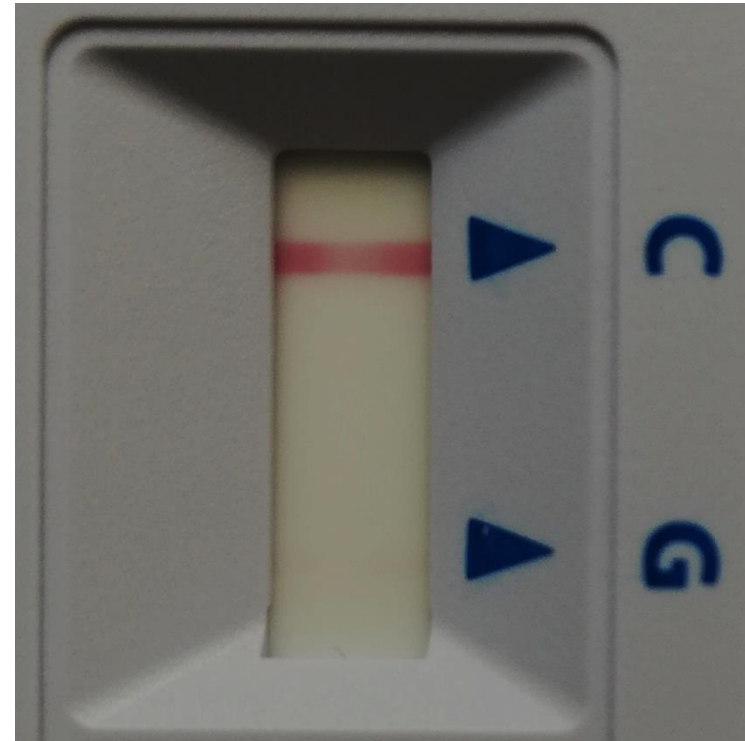

→ IgG weakly positive

# COVID-19 sera #11, #32, #34

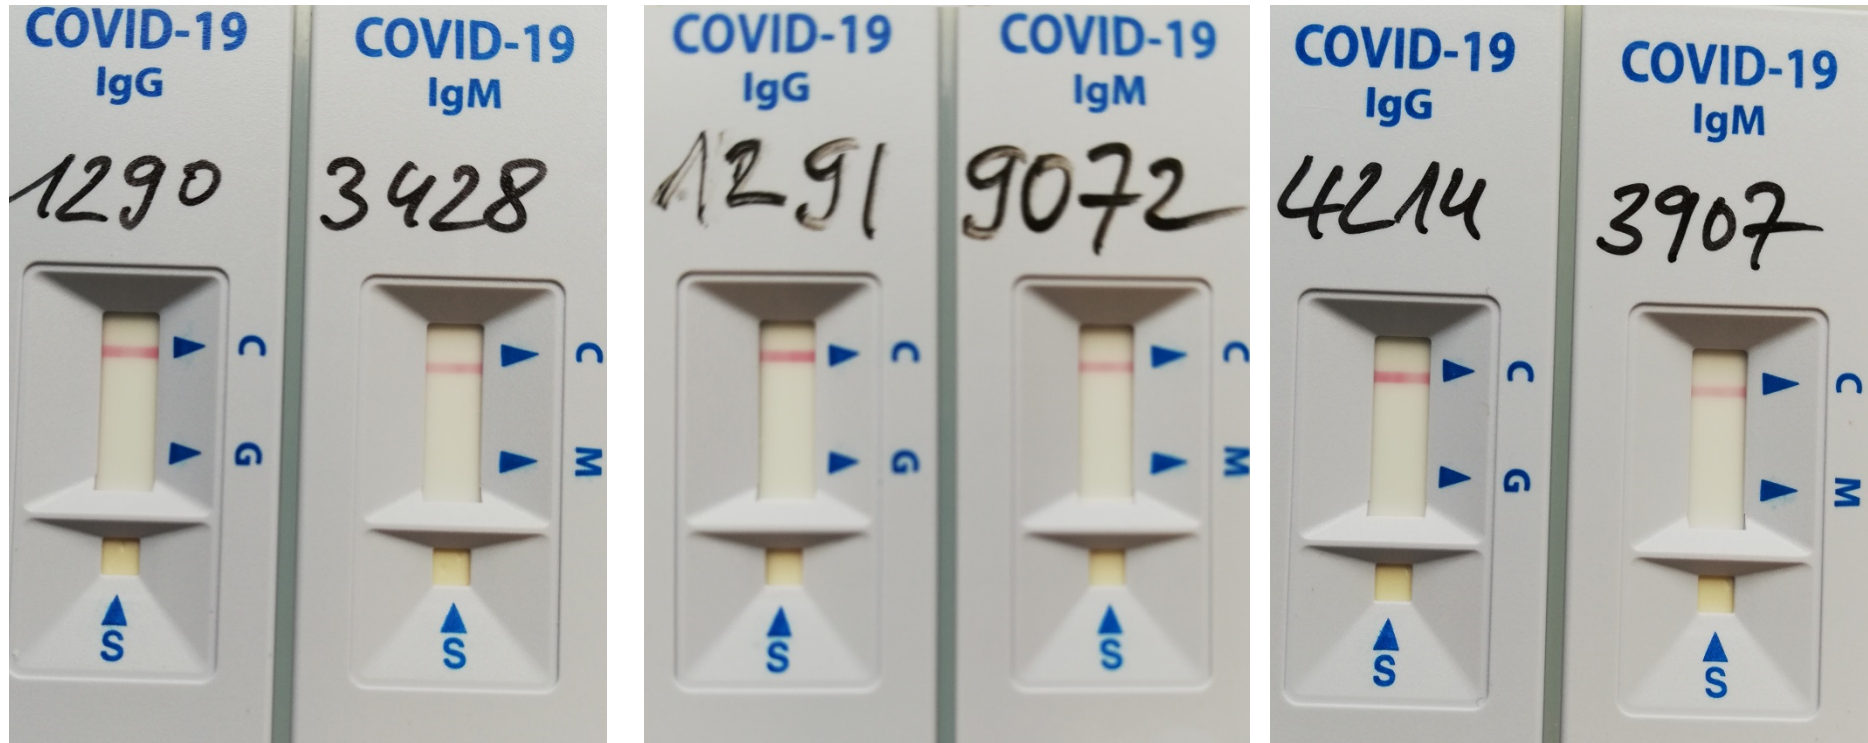

→ IgG negative

# Routine serum #4

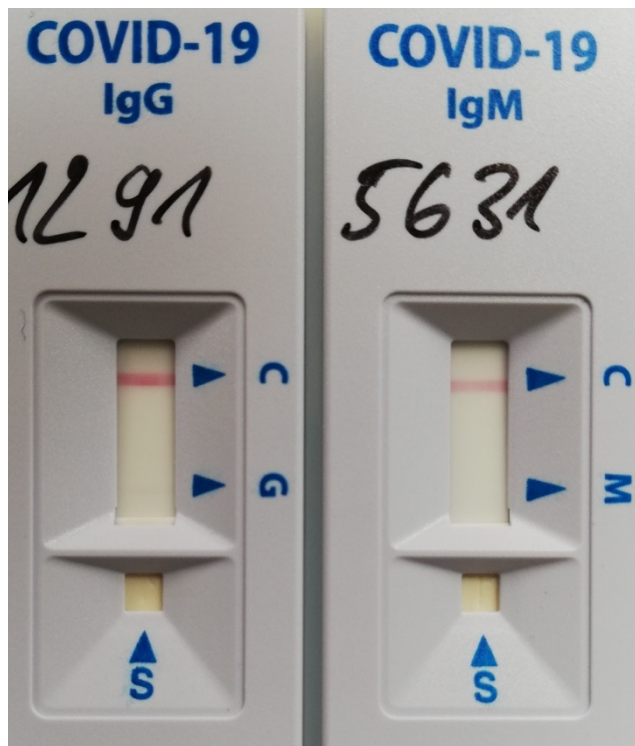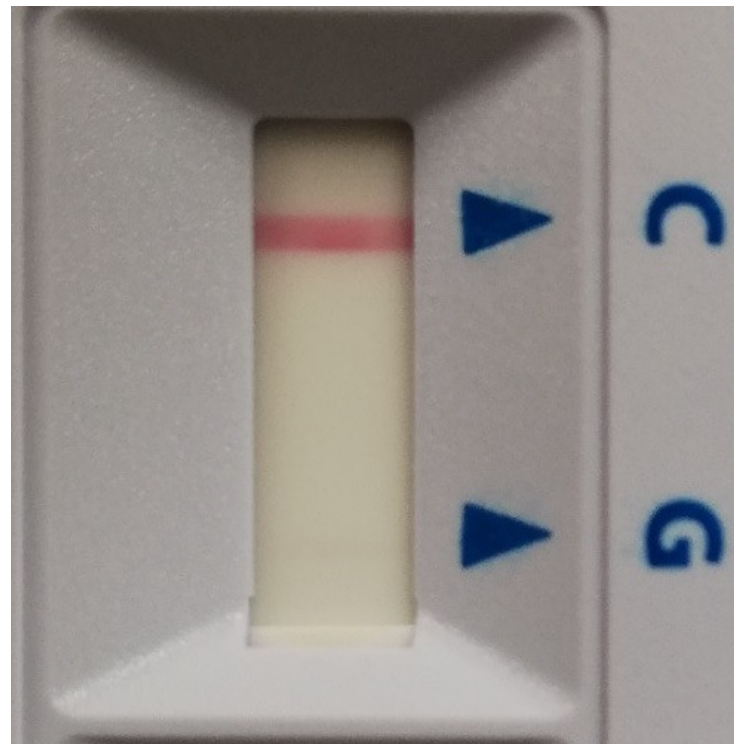

→ IgG weakly positive

# Routine serum #5

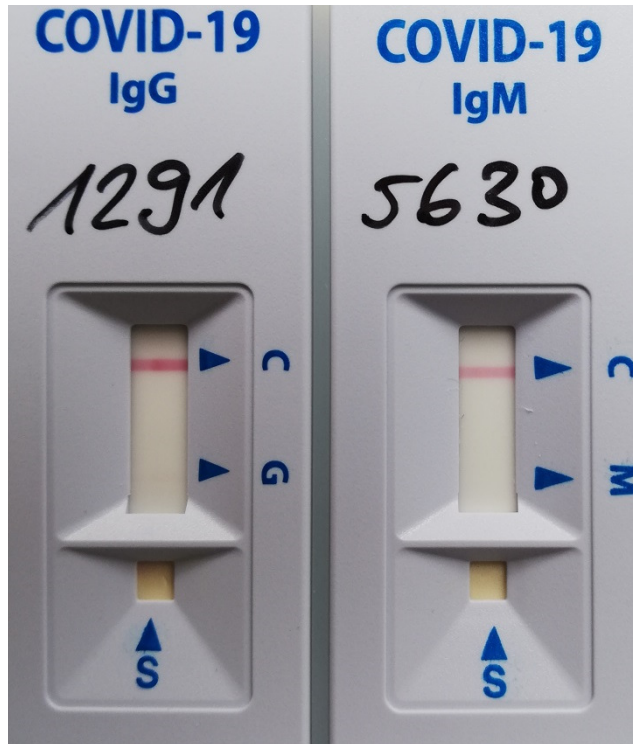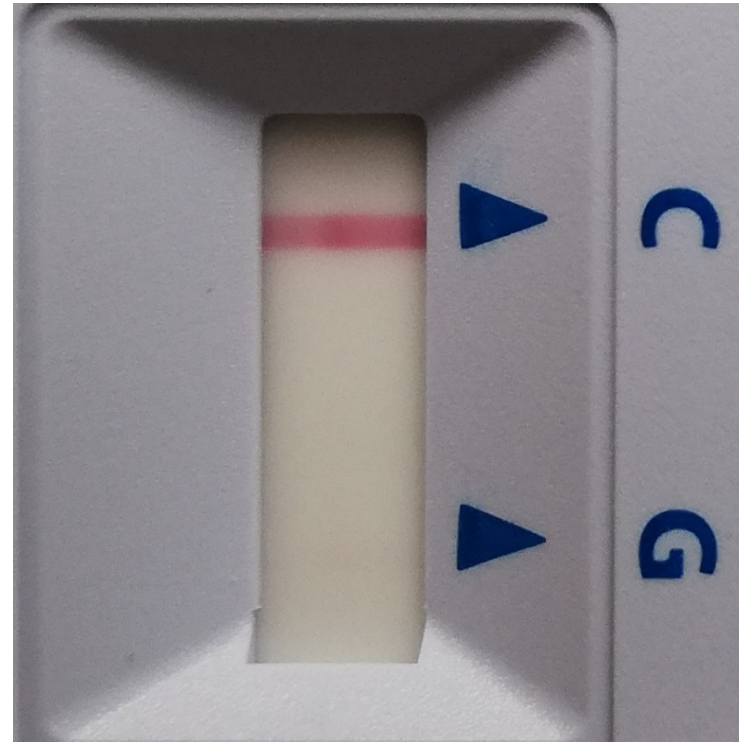

→ IgG weakly positive

# Routine serum #6

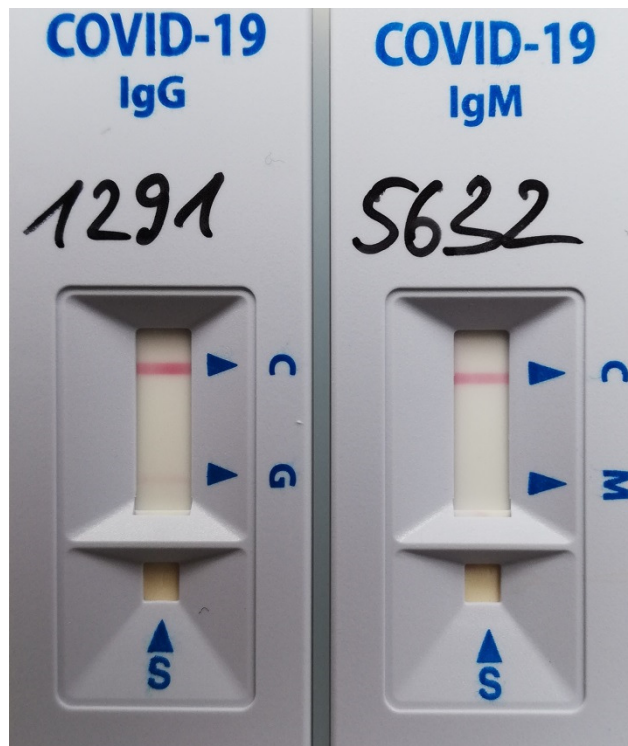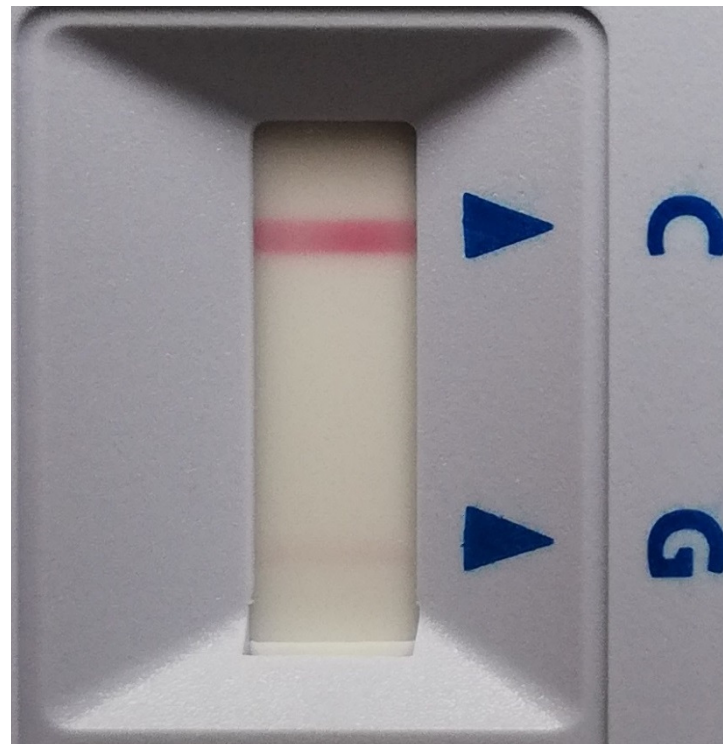

→ IgG weakly positive



# Routine sera #1, #2

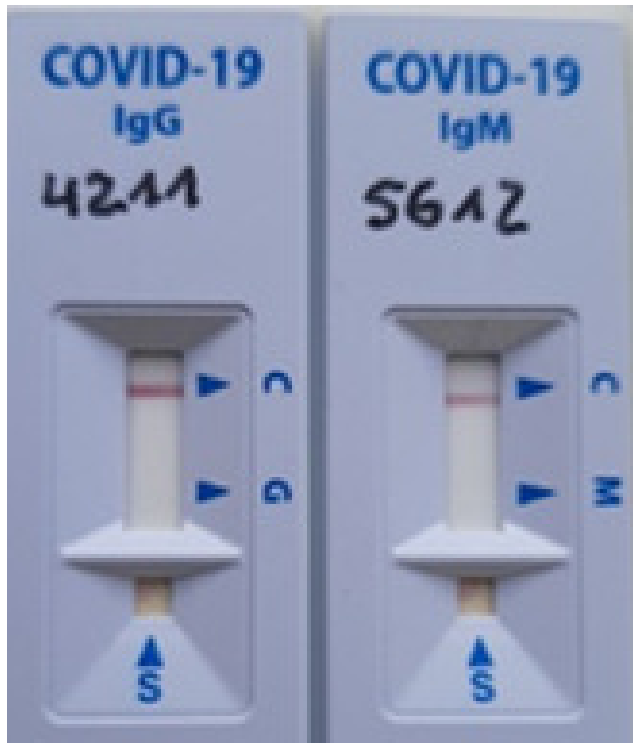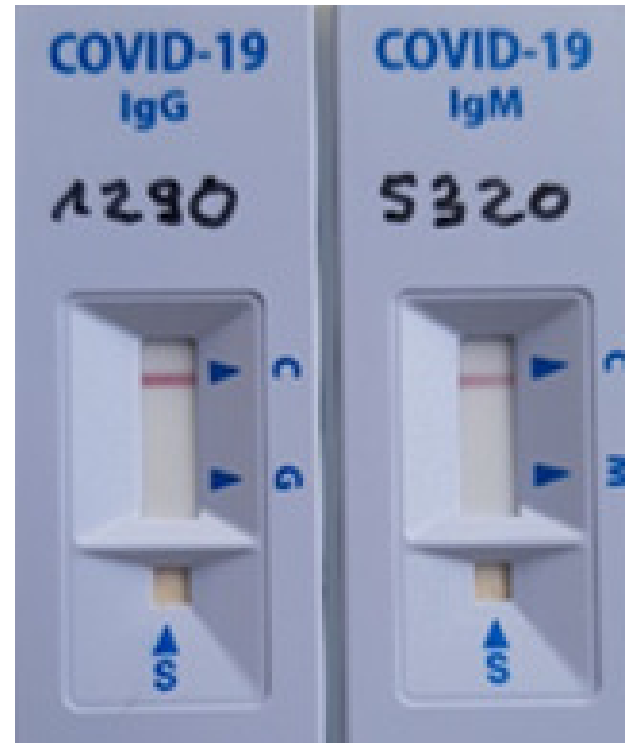

→ IgG negative

# Archived sera #23, #49, #66, #69, #101

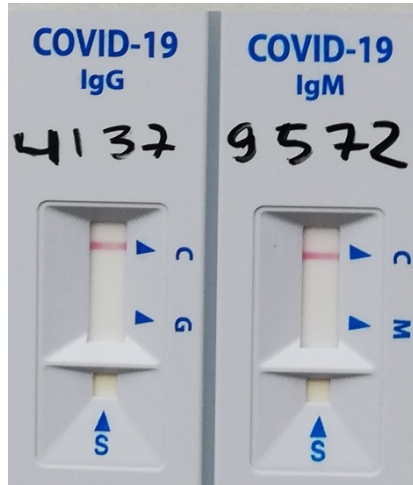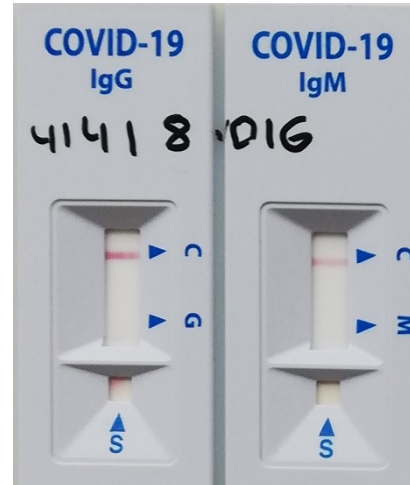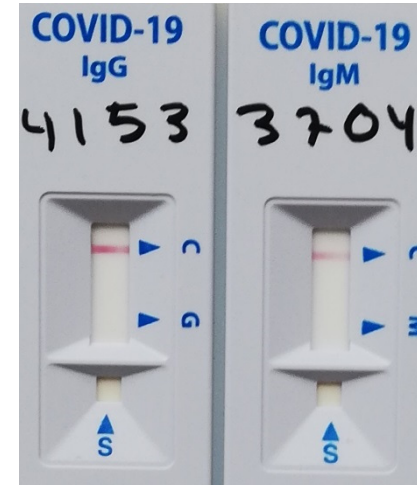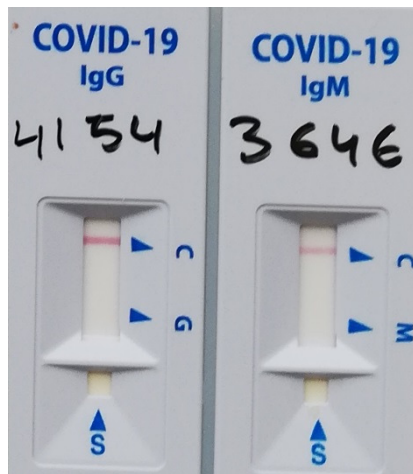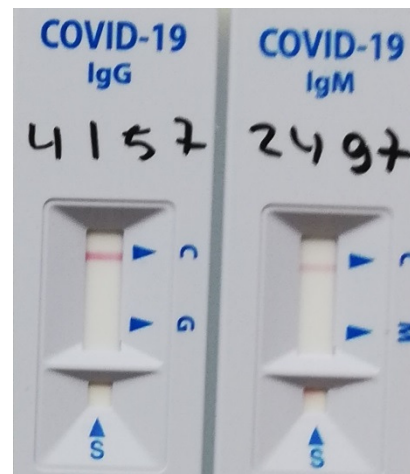

→ IgG negative
